# Supplementary material for: An innovative, fast and facile soft-template approach for the fabrication of porous PDMS for oil–water separation
Source: Royal Society of Chemistry journal article supplement (doi:10.1039/c7ta06840a), 2017-01-01
Supplement: c7ta06840a1.pdf [file c7ta06840a1.pdf]

## Electronic Supplementary Material

*Movie S1* Formation of air cushion during immersion of PDMS sponge in water

*Movie S2* Removal of oil red O colored hexane on water surface with PDMS sponge produced by soft-template method.

*Movie S3* Removal of oil red O colored chloroform with PDMS- sponge produced by soft-template method.

*Movie S4* Recovery of absorbed oil from sponge produced by soft-template method by squeezing.

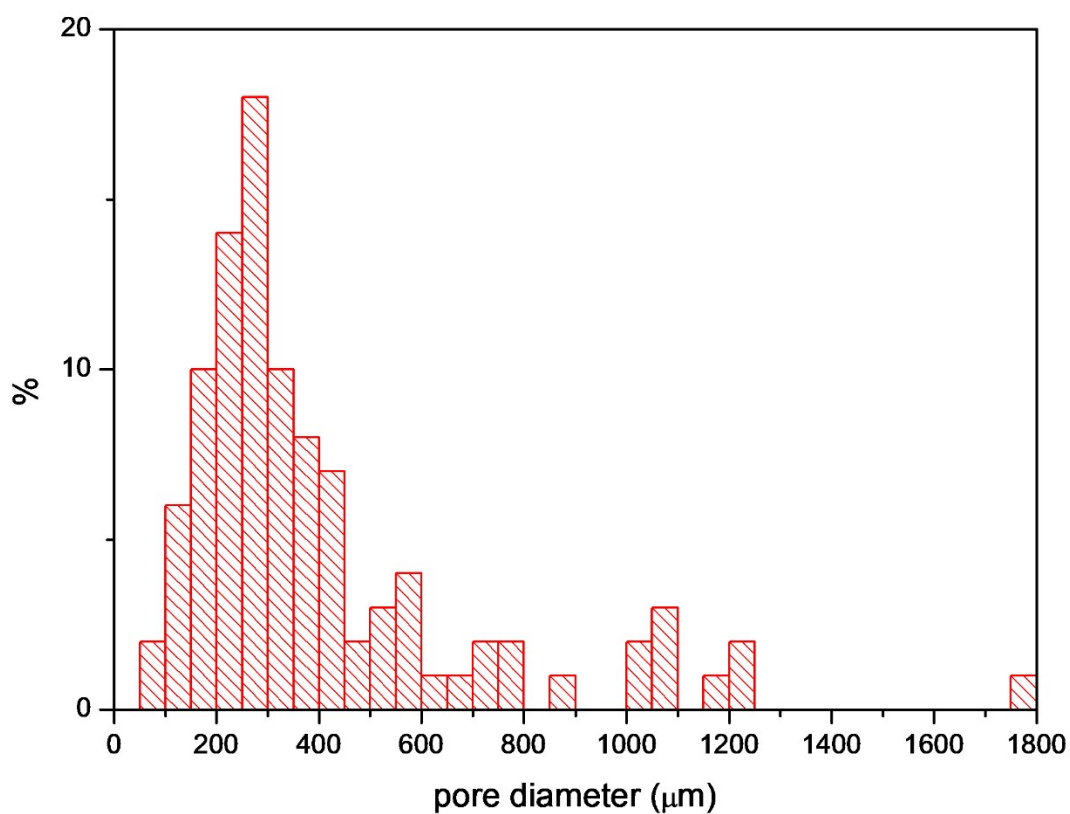

*Figure S1* Pore size distribution of the PDMS sponge prepared from a continuous phase consisting of PDMS prepolymer and thermal curing agent in a ratio of 10:1 by weight and hexane/prepolymer ratio equal to 8:2

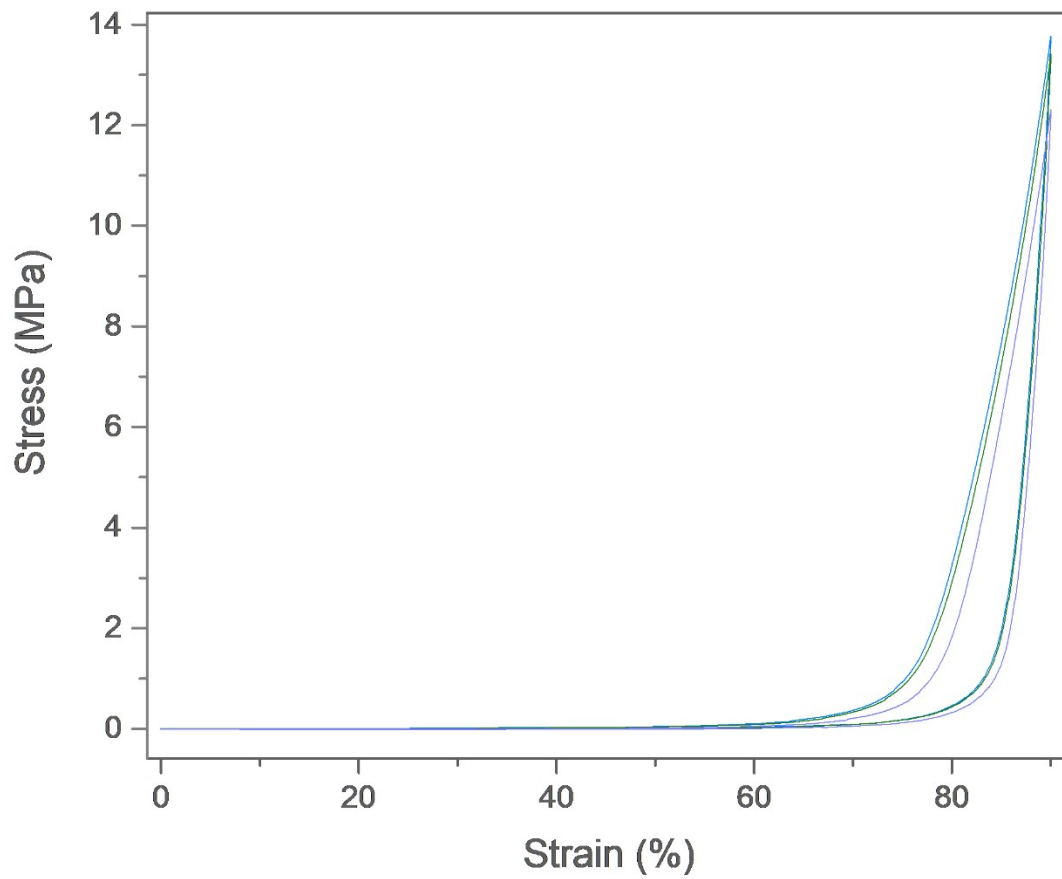

Figure S2 Compressive stress strain curve at 90% strain of PDMS sponge after 1 (blue curve), 200 (green curve) and 300 (violet curve) cycles
